# Supplementary material
Source: PubMed Central journal article supplement (PMC2660763)
Supplement: 0810418106_0810418106SI.pdf [file 0810418106_0810418106SI.pdf]

# Supporting Information

Wang et al. 10.1073/pnas.0810418106

## SI Methods

### DNA Isolation, Amplification, Labeling, and Microarray Hybridization.

The genomic DNA was isolated from the chimneys (1) and amplified by using 50 ng of DNA as described previously (2). The amplified DNA was fluorescently labeled with cy5 dye (GE Healthcare) by using random primers and Klenow (large fragment of DNA polymerase I; Invitrogen) according to the manufacturer's directions. The microarray hybridization was conducted at 50 °C in the presence of 50% formamide, as previously described (3). All hybridization experiments were carried out in duplicate.

**Microarray Scanning and Data Processing.** A ScanArray 500 microarray system (PerkinElmer) was used for scanning the microarray slides. Scanned images were processed by using ImageGene, version 5.0 (Biodiscovery), as described previously (4). The signal-to-noise ratio (SNR) was calculated based on the formula:  $SNR = (\text{signal intensity} - \text{background}) / \text{standard deviation of background}$ . Spots with SNR greater or equal to 3 were regarded as positive. Data processing, such as outlier removal, normalization, and poor spot removal, was carried out as previously described (2).

### Constructing 16S rRNA, *mcrA*, *cbbL*, and *cbbM* Gene Clone Libraries.

The archaeal and bacterial 16S rRNA gene clone libraries were constructed by using universal primer sets Arch 27F/958R and Bac21F/1492R, respectively. RubisCO Form I *cbbL* genes were amplified with primers 595F/1387R with an 800-bp fragment, whereas Form II *cbbM* genes were amplified with cbbM663F/cbbM1033R, which yields a 400-bp fragment (5). The *mcrA* gene was amplified with primers ME1 and ME2 (6). The PCR products were purified on a 1% agarose gel, extracted with a

gel-extraction kit (Omega Bio-Tek Inc.). Afterward, the purified DNA products were ligated with the pMD18-T vector (Takara) and transformed to competent cells of *Escherichia coli* DH-5 $\alpha$  according to the manufacturer's instructions.

**Quantitative PCR.** Serial dilutions of positive control DNA were used as calibration standards for the quantitative real-time PCR. The positive control DNA extracts were amplified with the *cbbM* primers (328 bp) (7), with sulfide-chimney DNA from this study as the template. The resulting amplicons were purified with a gel-extraction kit (Omega Bio-Tek Inc.) as recommended by the manufacturer, and were cloned to the pMD18-T vector. After reamplification with vector-specific primers according to the manufacturer's instructions, the PCR products were purified as described above. The PCR products obtained were then quantified with the NanoDrop ND-1000 spectrophotometer (NanoDrop Technologies). The measured DNA amount was converted to target molecule numbers per microliter, and the *cbbM* standards were adjusted to 10<sup>10</sup> target molecules per microliter by serial dilution. PCR and monitoring of SYBR Green I fluorogenic probe signals were performed by using an ABI Prism 7500 (Applied Biosystems). Copy numbers of the *cbbL* gene were determined by quantitative competitive PCR (QC-PCR). The liner plasmid pMD-18T  $\Delta$ 150bp was used as the competitive template DNA. PCR products were separated by electrophoresis using 2.0% (wt/vol) agarose with TBE buffer (90 mM Tris, 90 mM boric acid, and 2 mM Na<sub>2</sub>-EDTA; pH 8.0) and were stained with ethidium bromide. The copy number of the target gene was estimated by considering the band intensity and sizes of target and standard DNA and the initial concentration of *cbbL* present in chimney DNA; this concentration was subsequently adjusted to obtain a gene copy value on a wet-weight basis.

1. Zhou J, Bruns MA, Tiedje JM (1996) DNA recovery from soils of diverse composition. *Appl Environ Microbiol* 62:316–322.
2. Wu L, Liu X, Schadt CW, Zhou J (2006) Microarray-based analysis of subnanogram quantities of microbial community DNAs by using whole-community genome amplification. *Appl Environ Microbiol* 72:4931–4941.
3. Yergeau E, Kang S, He Z, Zhou J, Kowalchuk GA (2007) Functional microarray analysis of nitrogen and carbon cycling genes across an Antarctic latitudinal transect. *Isme J* 11:163–179.
4. Wu L, et al. (2004) Development and evaluation of microarray-based whole-genome hybridization for detection of microorganisms within the context of environmental applications. *Environ Sci Technol* 38:6775–6782.

5. Elsaied H, Naganuma T (2001) Phylogenetic diversity of ribulose-1,5-bisphosphate carboxylase/oxygenase large-subunit genes from deep-sea microorganisms. *Appl Environ Microbiol* 67:1751–1765.
6. Hales BA, et al. (1996) Isolation and identification of methanogen-specific DNA from blanket bog peat by PCR amplification and sequence analysis. *Appl Environ Microbiol* 62:668–675.
7. Campbell BJ, Stein JL, Cary SC (2003) Evidence of chemolithoautotrophy in the bacterial community associated with *Alvinella pompejana*, a hydrothermal vent polychaete. *Appl Environ Microbiol* 69:5070–5078.

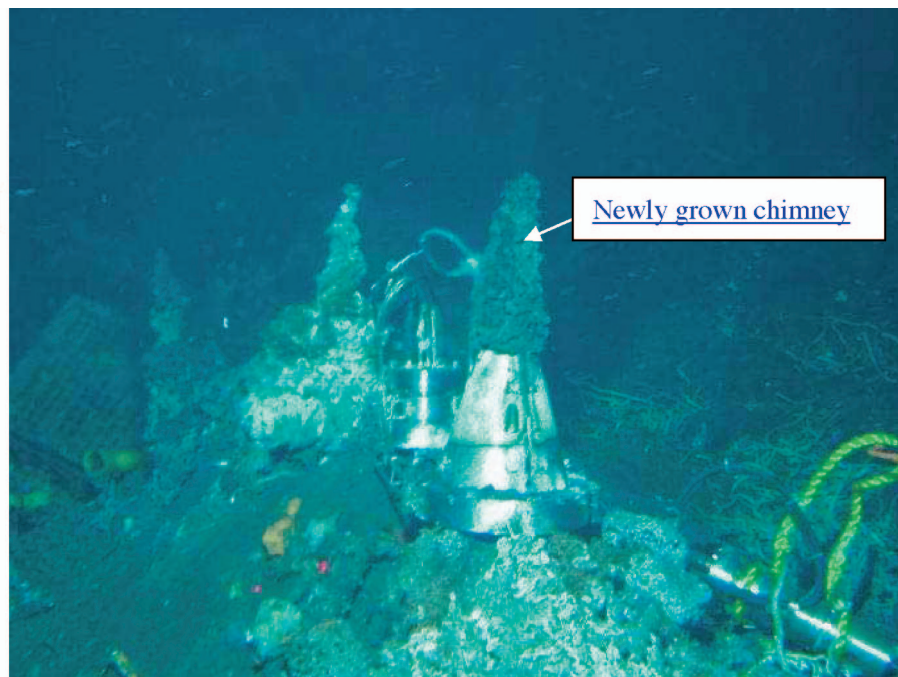

**Fig. S1.** A photo showing a newly grown chimney from the opening of the stainless steel cap deployed on top of a chimney venting at  $\approx 316$  °C at Main Endeavour, Juan de Fuca Ridge.

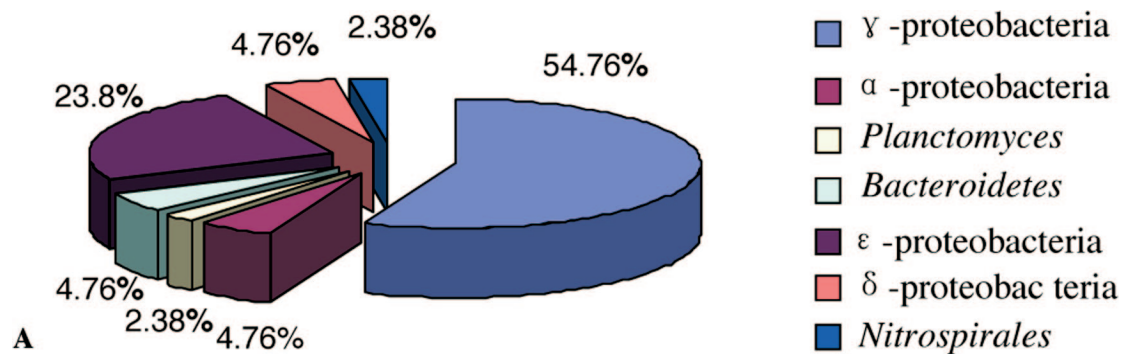

**Fig. S2.** Microbial community diversity of 16S rRNA gene analysis in 4143-1. (A) Proportion of different bacterial divisions within the bacterial community of 4143-1. The percentage was calculated by dividing the number of OTUs in the bacterial division with the total number of sequenced bacterial 16S rRNA gene clones. (B) Phylogenetic tree constructed from bacterial 16S rRNA gene sequences. The phylogenetic relationships among the retrieved bacterial 16S rRNA gene sequences from 4143-1 and the reference sequences from GenBank are shown. The tree was inferred by neighbor-joining analysis of 16S rRNA gene sequences with software Mega 4.0 (Center of Evolutionary Functional Genomics, Biodesign Institute, Arizona State University). Clones from this study are shown in bold. The numbers in parentheses are the GenBank accession numbers for sequences obtained from the National Center for Biotechnology Information database. Bootstrap percentages were obtained by using 1,000 replicates, and values greater than 50% are indicated at the nodes. The scale bar represents 5% of changes per nucleotide position. (C) Phylogenetic tree constructed from archaeal 16S rRNA gene sequences. (D) Rarefaction curves for bacterial and archaeal 16S rRNA sequences from 4143-1 sample.



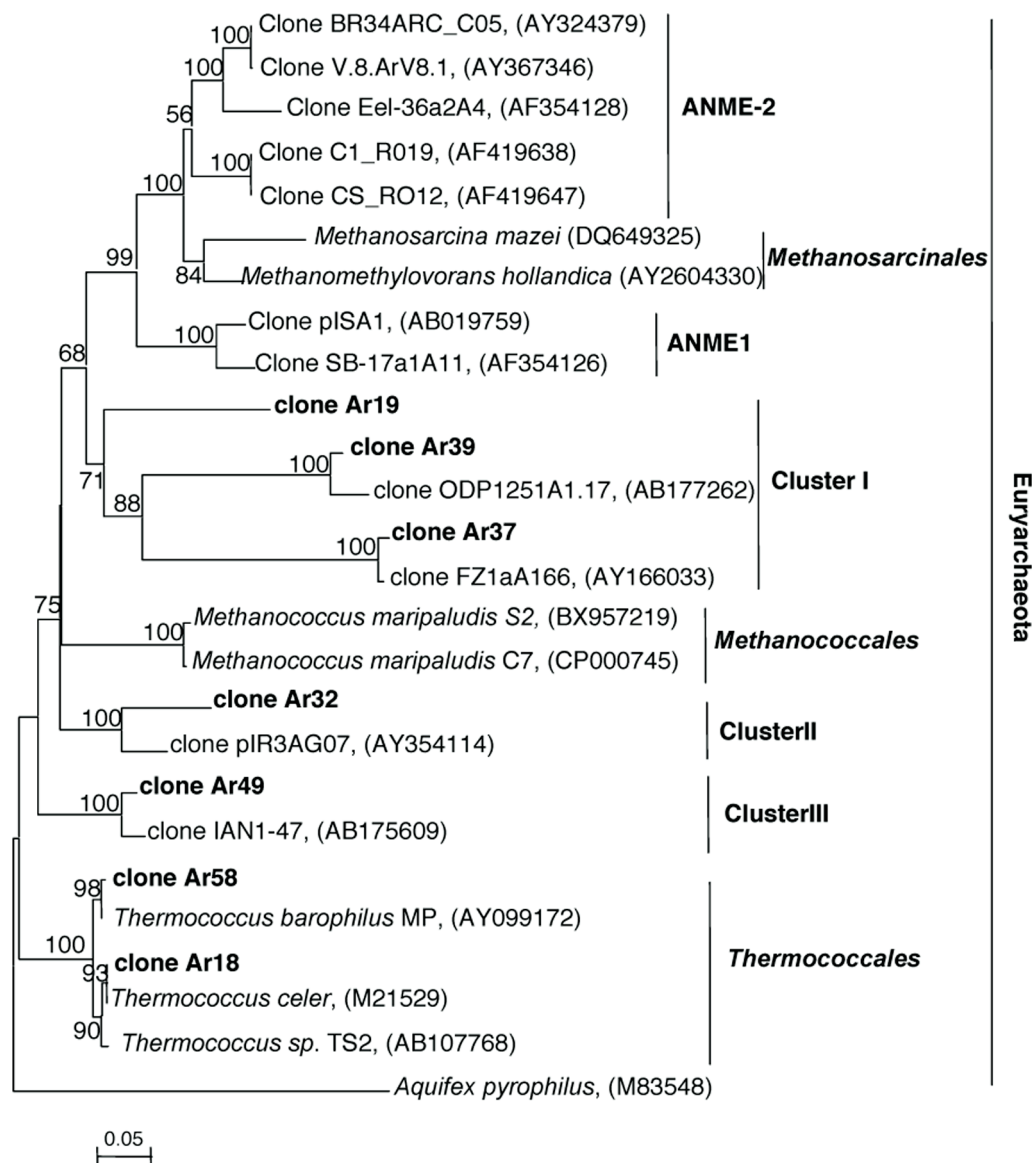

C

Fig. S2. Continued.

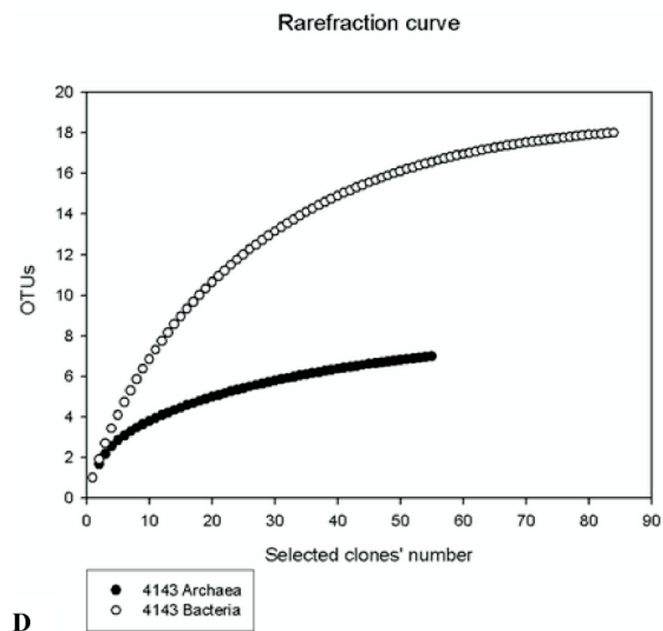

Fig. S2. Continued.

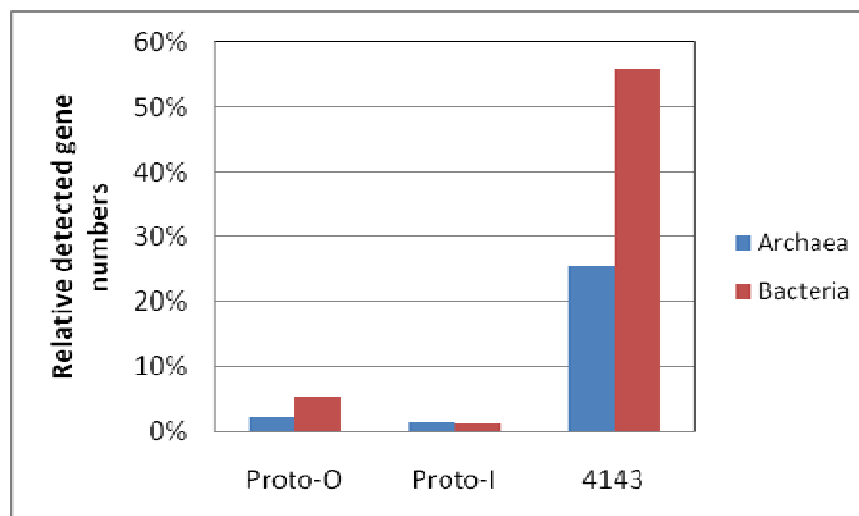

**A**

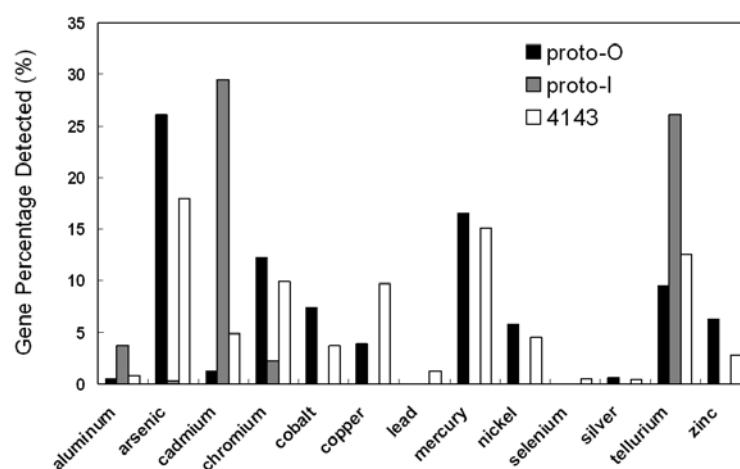

**B**

**Fig. S3.** Relative abundance of genes detected. (A) Relative proportions of detected archaeal or bacterial gene numbers from the chimney samples versus their respective total gene numbers on the chip. There are a total of 8,371 and 594 genes from Bacteria and Archaea on the chip, respectively. (B) Percentage of genes for metal resistance. The percentage of genes involved in aluminum, arsenic, cadmium, chromium, cobalt, copper, lead, mercury, nickel, selenium, silver, tellurium, and zinc were calculated by dividing the total signal intensity values for each individual metal-resistance group by the total intensity values of all metal-resistance genes detected on the array.

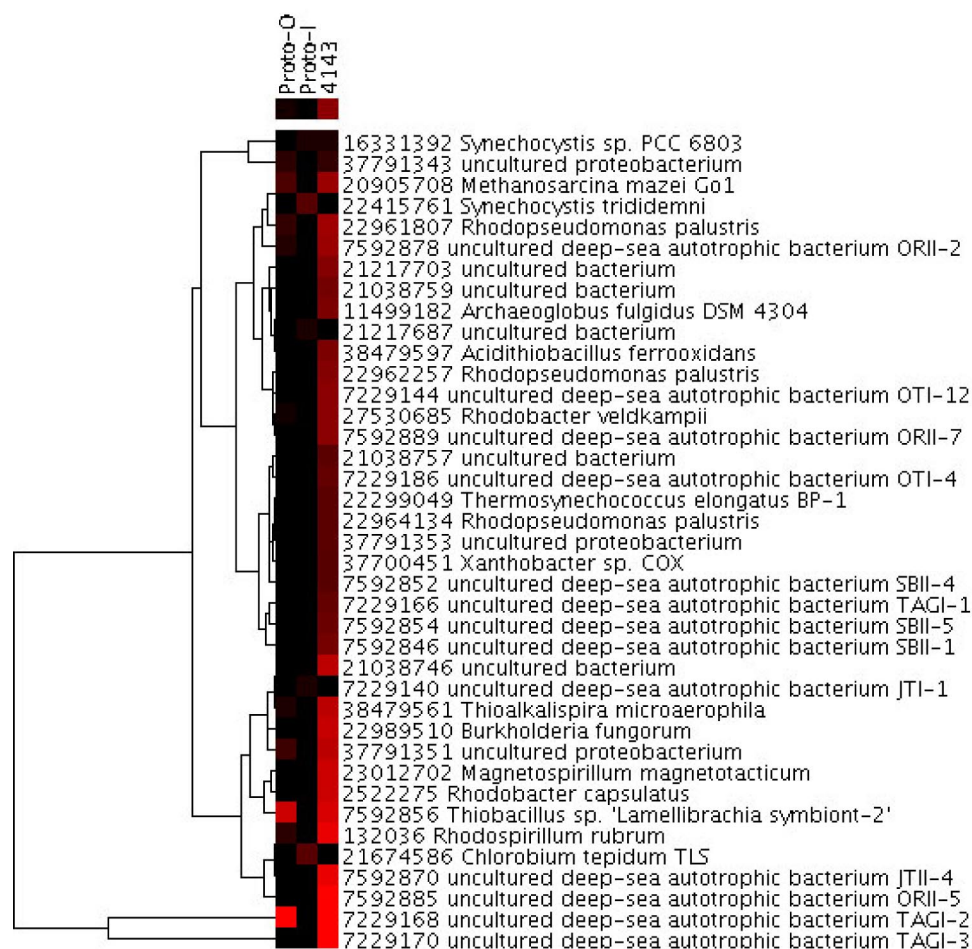

**A**

**Fig. S4.** Analysis of CO<sub>2</sub> fixation genes detected. (A) Hierarchical cluster analysis of *rbcL* genes based on hybridization signals for Proto-I, Proto-O, and 4143-1. The figure was generated by using CLUSTER (<http://rana.lbl.gov/EisenSoftware.htm>) and visualized with TREEVIEW (<http://rana.lbl.gov/EisenSoftware.htm>). Black represents no hybridization above background level, and red represents positive hybridization. The color intensity indicates differences in hybridization patterns. All genes detected in Proto-I and Proto-O are listed, but only the genes with signal intensities greater than 1 from 4143-1 were included here. (B) Phylogenetic tree based on the deduced amino acid sequences of RubisCO large-subunit genes. Clone sequences (OTUs) retrieved from *cbbL* and *cbbM* clone libraries are indicated in bold. (Scale bar: 0.1 substitutions per site.) See the Fig. S2B legend for details.

# Form IA

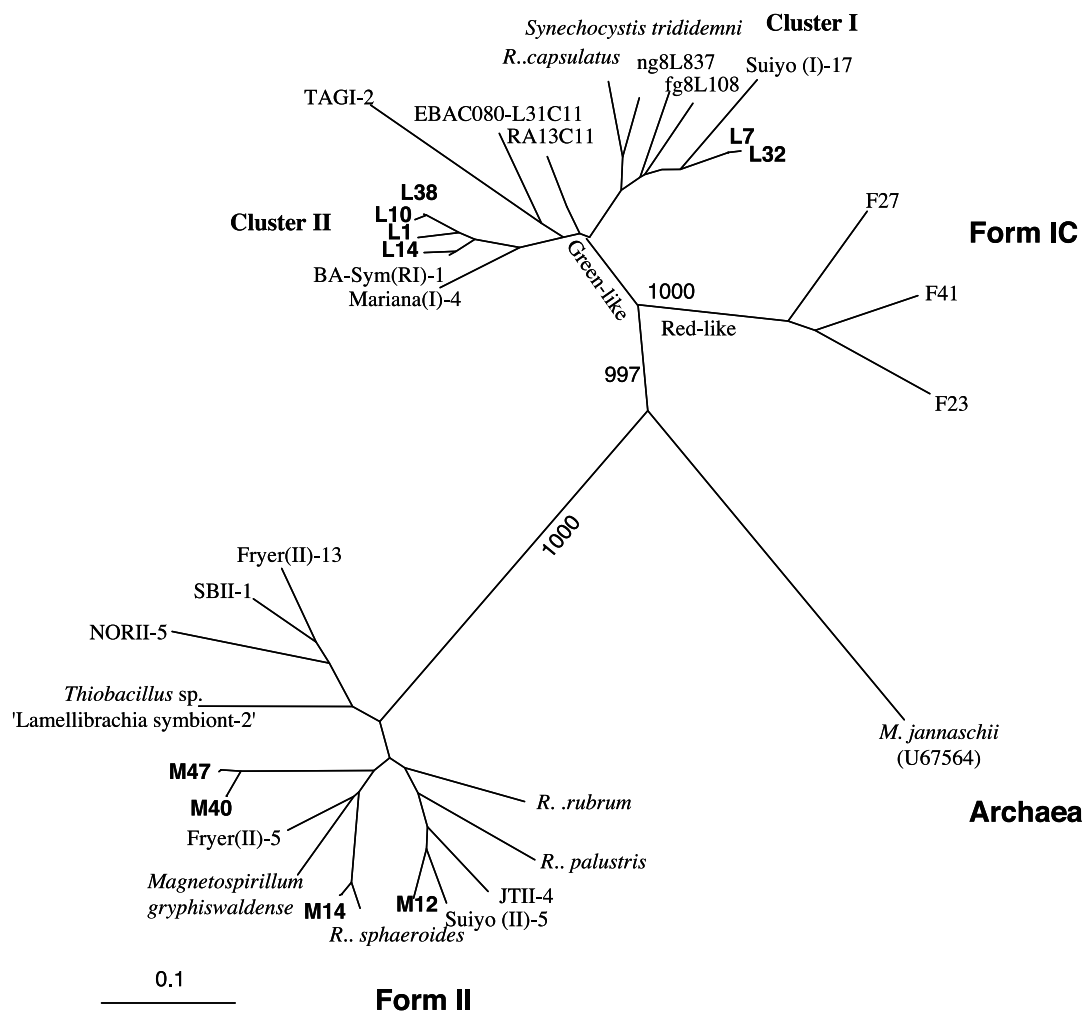**B**

**Fig. S4.** Continued.

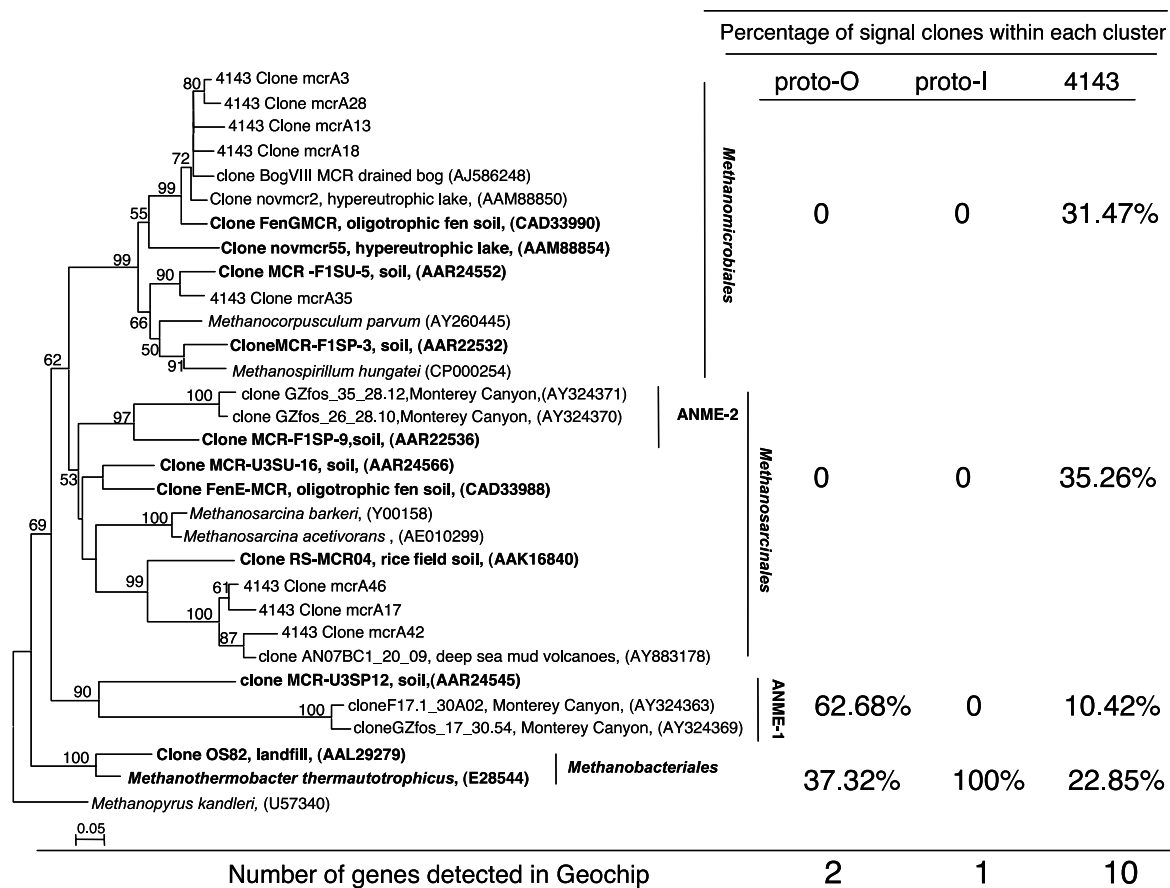

A

**Fig. S5.** Analysis of *mcrA* and *pmoA* genes detected. (A) Phylogenetic tree based on *mcrA* gene sequences. The clones retrieved from 4143-1 through the *mcrA* clone library are designated "4143-1 Clone *mcrA*," followed by the clone number. (B) Phylogenetic tree based on *pmoA* gene sequences. Sequences collected from GeoChip hybridization are shown in bold. The tree was inferred by the neighbor-joining method with Mega 4.0. See the Fig. S2B legend for details. (C) Hierarchical cluster analysis of *mcrA* genes. (D) Hierarchical cluster analysis of *pmoA* genes. See Fig. S4A legend for details

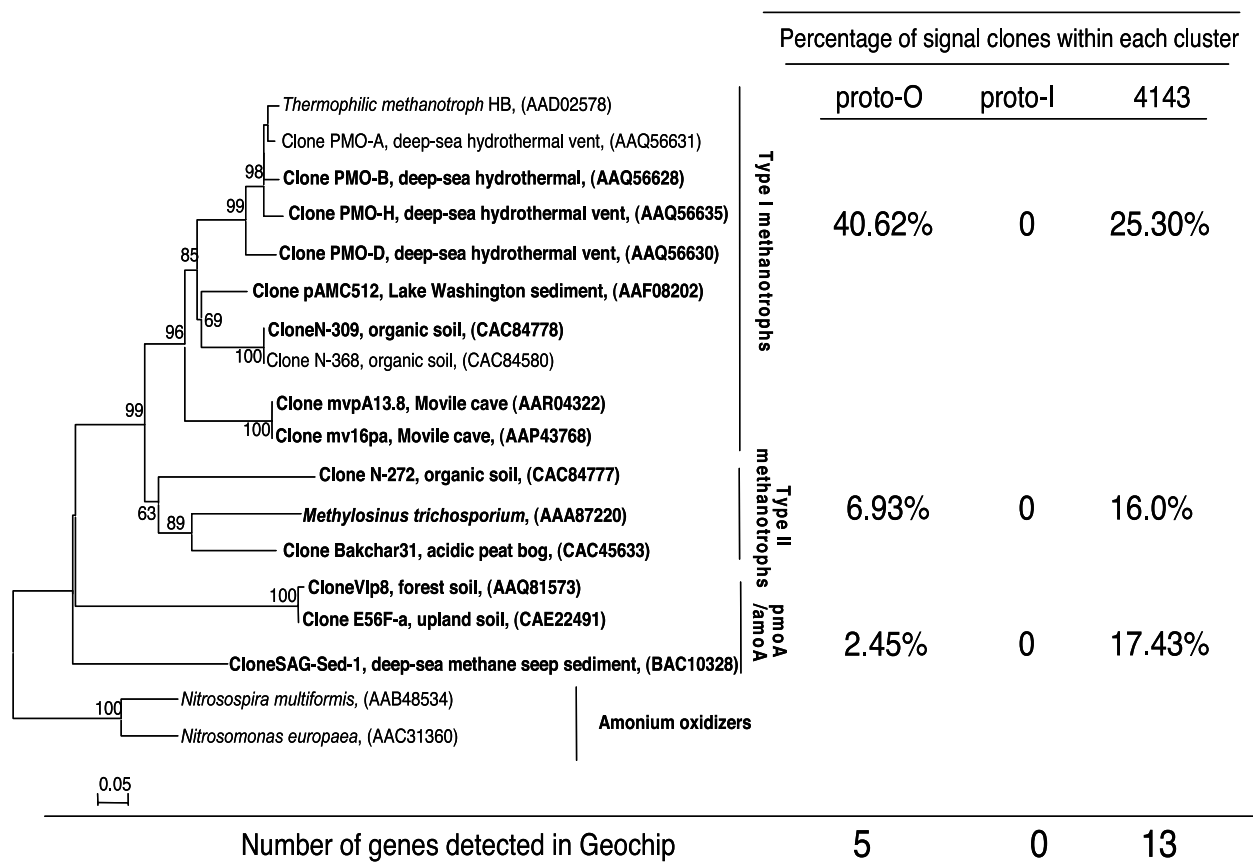

B

Fig. S5. Continued.

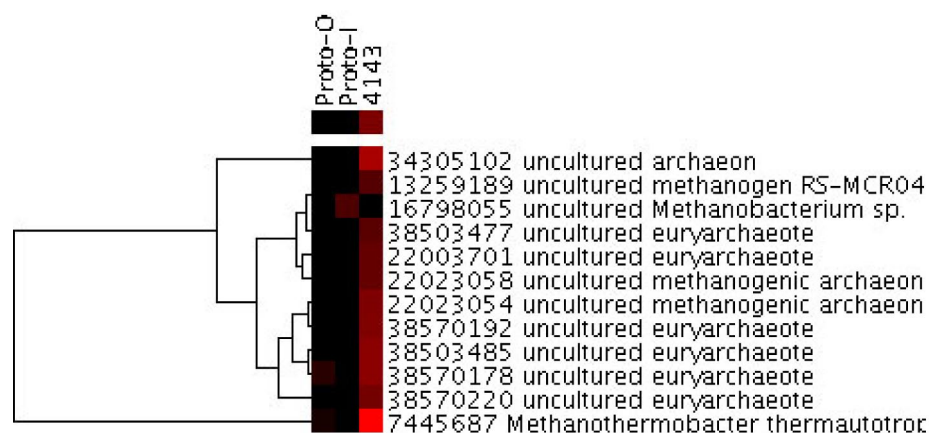

C

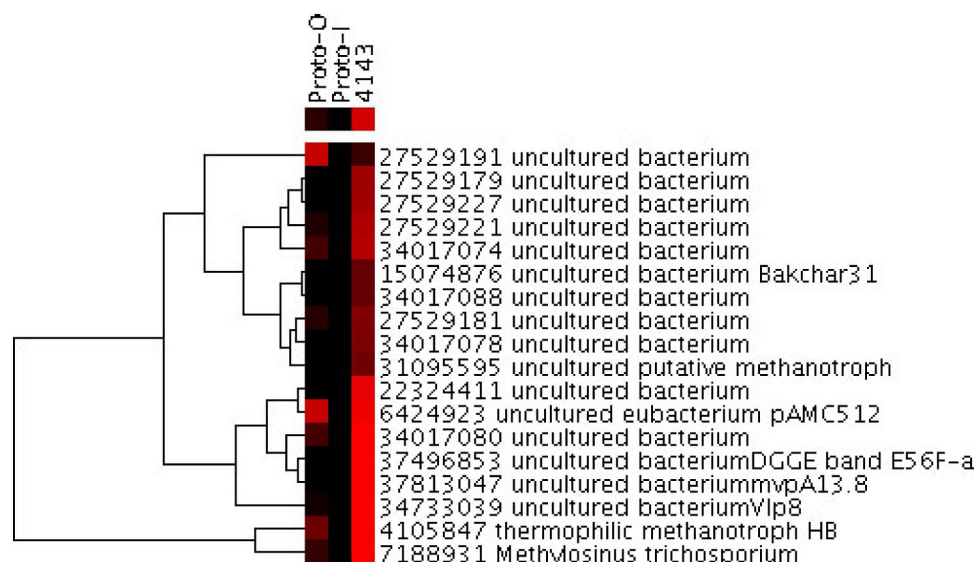

D

Fig. S5. Continued.

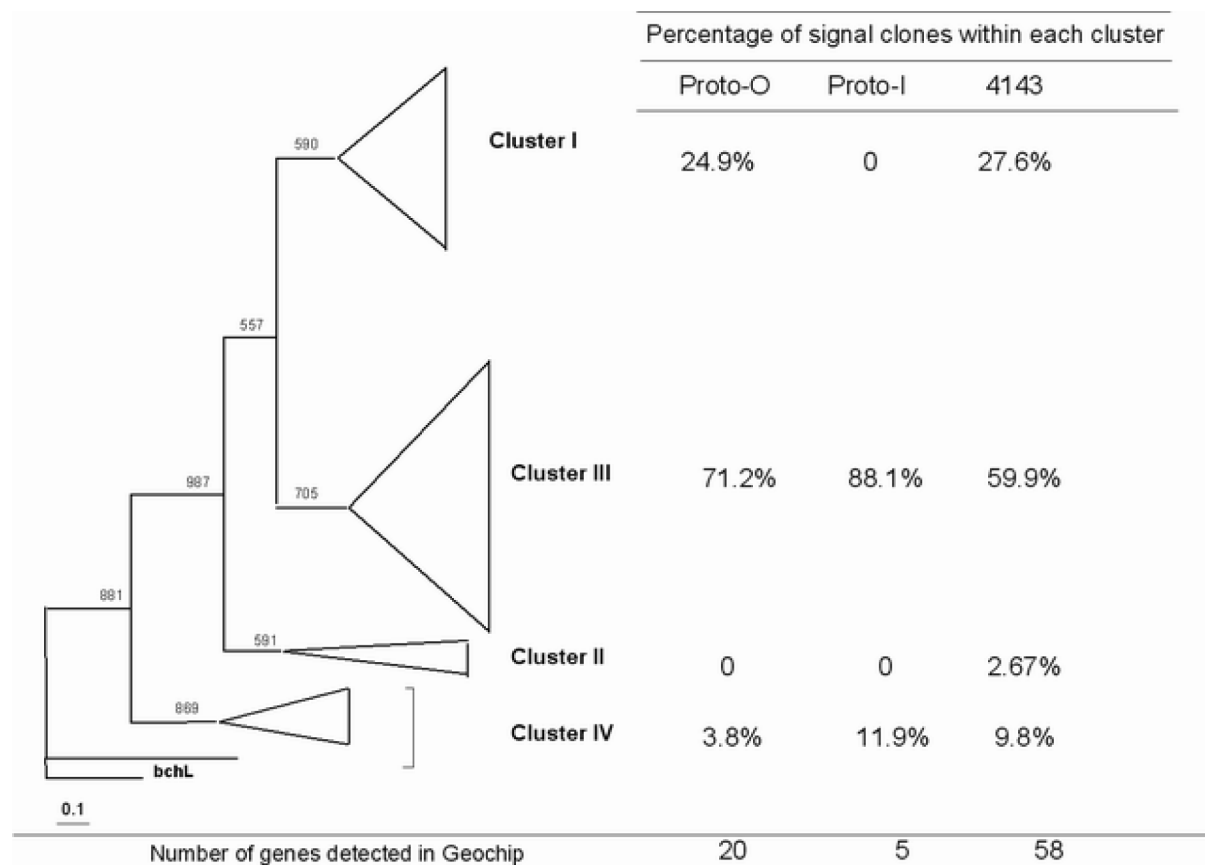

**Fig. S6.** Maximum-likelihood phylogenetic tree of *nifH* sequences obtained from GeoChip showing the phylogenetic relationship among the 4 *nifH* clusters. The depth and width of each wedge are proportional to the branch lengths and number of *nifH* sequences within each cluster, respectively. Cluster I contains  $\alpha$ -,  $\beta$ -, and  $\gamma$ -proteobacterial *nifH* sequences; cluster III contains anaerobic bacterial *nifH* sequences; cluster II contains methanogen and alternative *nifH* sequences; and cluster IV contains divergent archaeal *nifH* sequences. Light-independent protochlorophyllide reductase subunit L gene (*bchL*) from *Chlorobium tepidum* was used as an outgroup. The percentage of signal clones detected in each sample was listed near the phylogenetic tree. The total number of genes detected in GeoChip was summarized.

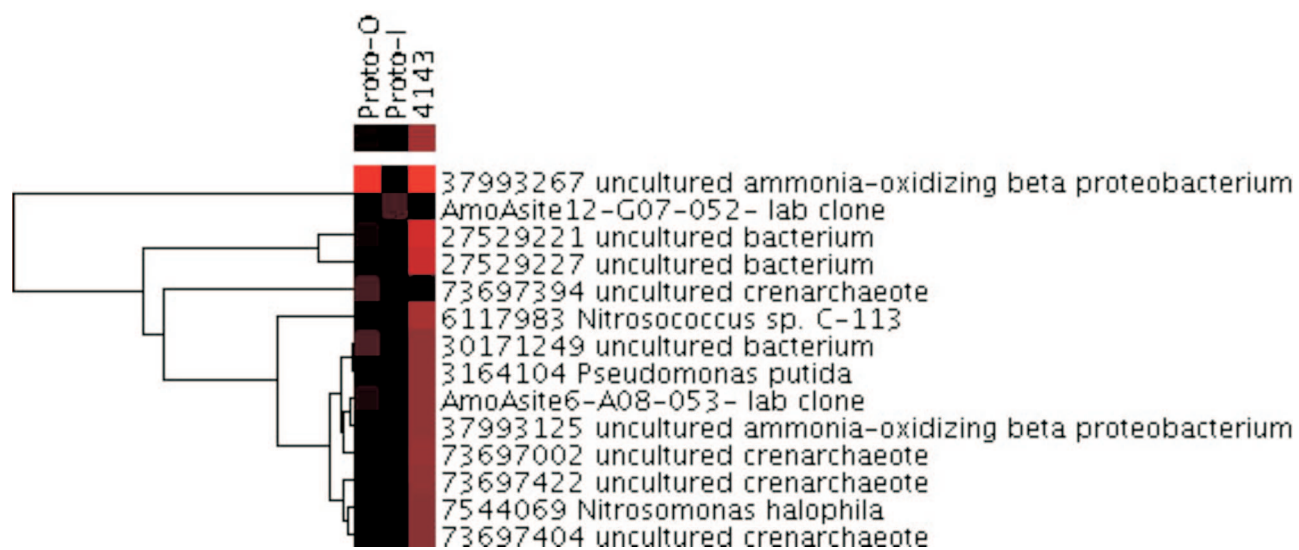

Fig. S7A. Hierarchical cluster analysis of *amoA* genes. See Fig. S4A legend for details.

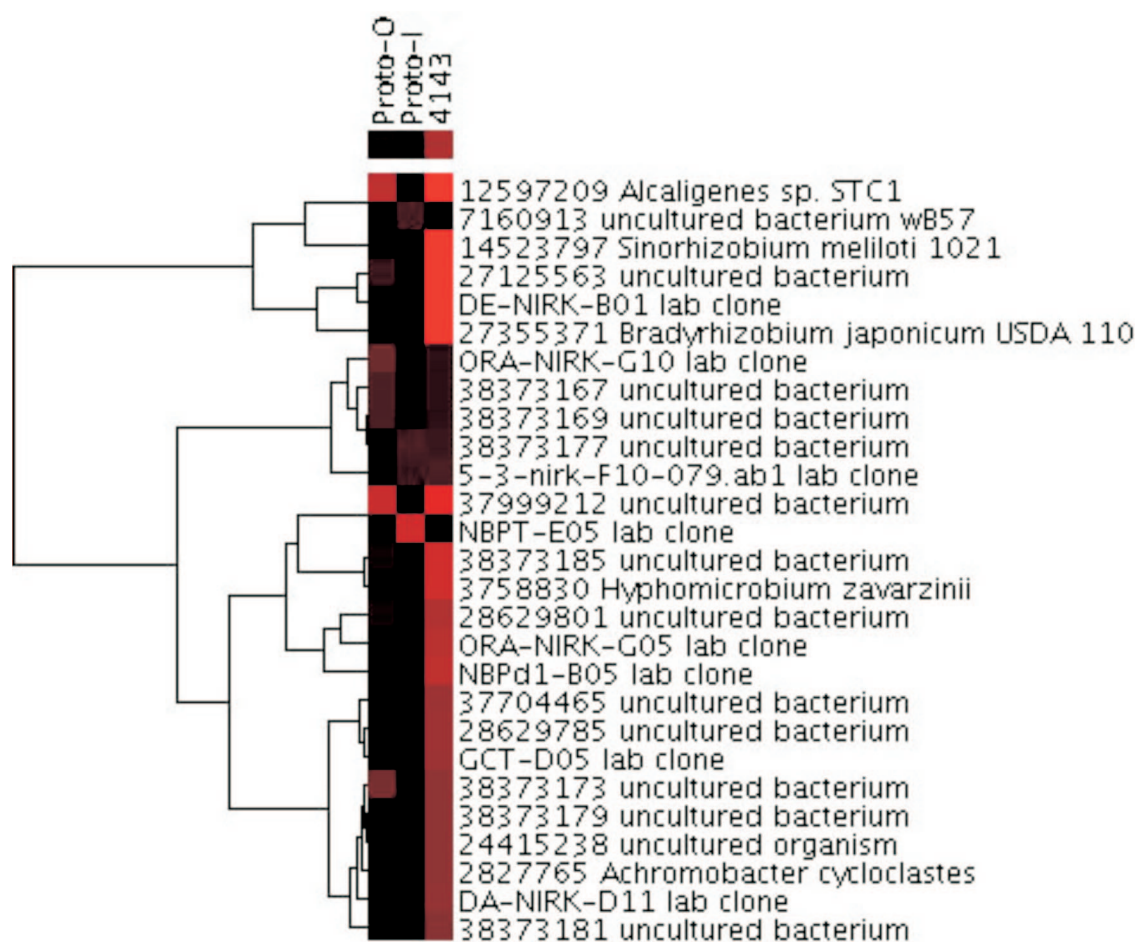

Fig. S7B. Hierarchical cluster analysis of *nirK* genes. See Fig. S4A legend for details.

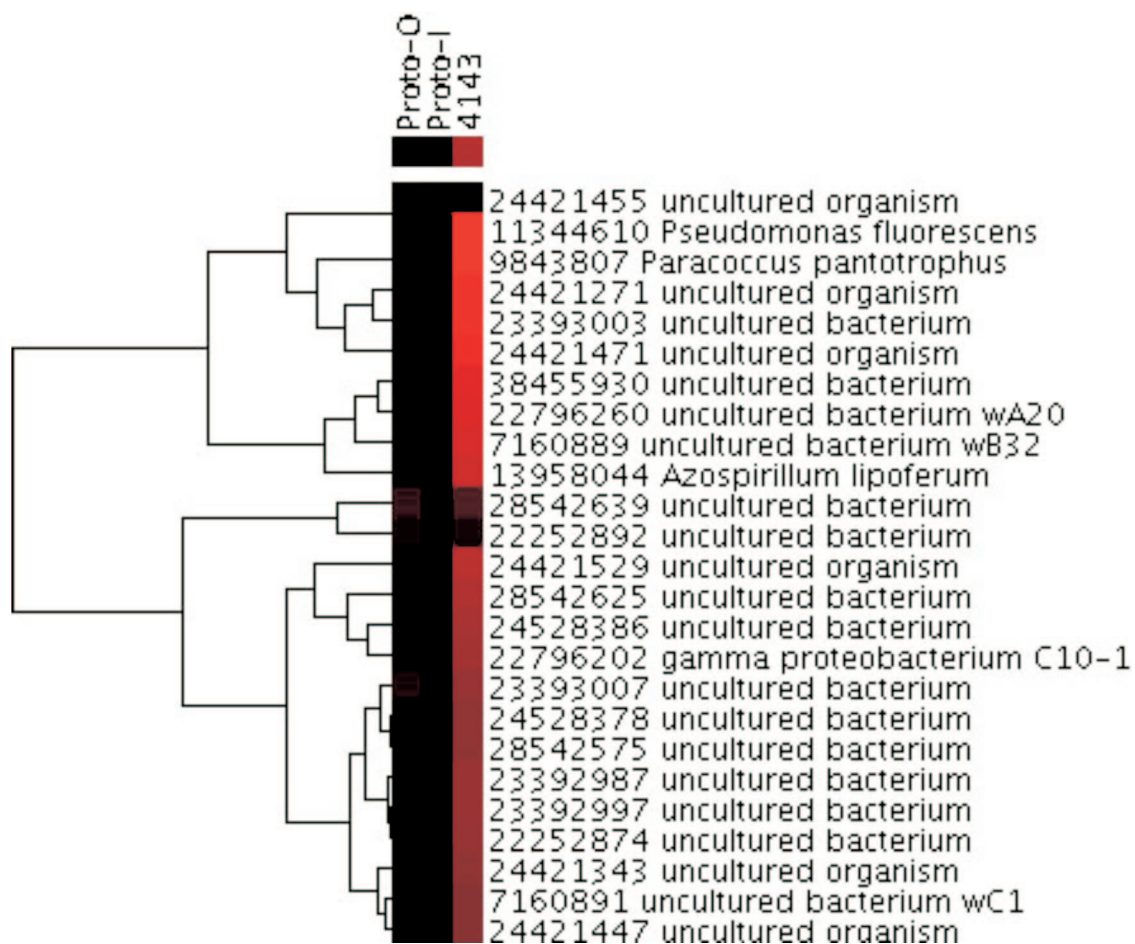

Fig. S7C. Hierarchical cluster analysis of *nirS* genes. See Fig. S4A legend for details.

**Table S1. Distribution of functional genes detected for major metabolic processes in chimney samples from Juan de Fuca Ridge**

| Gene category                   | Sample, no. (%) |            |              |
|---------------------------------|-----------------|------------|--------------|
|                                 | Proto-I         | Proto-O    | 4143-1       |
| Organic contaminant degradation | 53 (46.9)       | 217 (43.1) | 2,008 (37.1) |
| Carbon degradation              | 11 (9.7)        | 56 (11.1)  | 563 (10.4)   |
| Carbon fixation                 | 6 (5.3)         | 14 (2.8)   | 190 (3.5)    |
| Nitrogen fixation               | 5 (4.4)         | 22 (4.4)   | 233 (4.3)    |
| Nitrate reduction               | 8 (7.1)         | 30 (6)     | 534 (9.9)    |
| Nitrification                   | 11 (9.7)        | 23 (4.6)   | 391 (7.2)    |
| Methanogenesis                  | 1 (0.9)         | 2 (0.4)    | 62 (1.1)     |
| Anaerobic oxidation of methane  | 0               | 1 (0.2)    | 3 (0.1)      |
| Aerobic oxidation of methane    | 1 (0.9)         | 14 (2.8)   | 86 (1.6)     |
| Sulfate reduction               | 3 (2.7)         | 28 (5.6)   | 396 (7.3)    |
| Metal resistance                | 12 (10.6)       | 92 (18.3)  | 910 (16.8)   |
| Total genes                     | 113             | 504        | 5,414        |

**Table S2. *rbcL* genes detected by GeoChip**

| Probe reference no. | Gene | Reference sequence/organism                      | Signal intensity |
|---------------------|------|--------------------------------------------------|------------------|
| Proto-O             |      |                                                  |                  |
| BAC54026            | rbcL | Rhodobacter veldkampii                           | 0.2042           |
| AAR21097            | rbcL | Thioalkalispira microaerophila                   | 0.357            |
| BAA94444            | rbcL | Uncultured deep-sea autotrophic bacterium ORII-2 | 0.4093           |
| P04718              | rbcL | Rhodospirillum rubrum                            | 0.5155           |
| AAR03652            | rbcL | Uncultured proteobacterium                       | 0.5576           |
| ZP_00009413         | rbcL | Rhodopseudomonas palustris                       | 0.5996           |
| AAR03656            | rbcL | Uncultured proteobacterium                       | 0.7224           |
| AAM30945            | rbcL | Methanosarcina mazei Go1                         | 0.9123           |
| BAA94433            | rbcL | Thiobacillus sp. Lamellibrachia symbiont-2       | 2.4171           |
| BAA92470            | rbcL | Uncultured deep-sea autotrophic bacterium TAGI-2 | 4.1006           |
| Proto-I             |      |                                                  |                  |
| AAM34461            | rbcL | Uncultured deep-sea autotrophic bacterium JTI-1  | 0.2978           |
| NP_442120           | rbcL | Synechocystis sp. PCC 6803                       | 0.3369           |
| NP_662651           | rbcL | Uncultured bacterium                             | 0.3664           |
| BAC10575            | rbcL | Synechocystis trididemni                         | 1.0053           |
| AAR37722            | rbcL | Chlorobium tepidum TLS                           | 1.0612           |
| 4143                |      |                                                  |                  |
| BAA92470            | rbcL | Uncultured deep-sea autotrophic bacterium TAGI-2 | 5.8437           |
| BAA92471            | rbcL | Uncultured deep-sea autotrophic bacterium TAGI-3 | 4.0193           |
| BAA94447            | rbcL | Uncultured deep-sea autotrophic bacterium ORII-5 | 2.9827           |
| P04718              | rbcL | Rhodospirillum rubrum                            | 2.7958           |
| BAA94440            | rbcL | Uncultured deep-sea autotrophic bacterium JTII-4 | 2.7701           |
| BAA94433            | rbcL | Thiobacillus sp. Lamellibrachia symbiont-2       | 2.5599           |
| ZP_00052722         | rbcL | Magnetospirillum magnetotacticum                 | 2.4597           |
| AAC37141            | rbcL | Rhodobacter capsulatus                           | 2.4199           |
| ZP_00034564         | rbcL | Burkholderia fungorum                            | 2.3454           |
| AAR03656            | rbcL | Uncultured proteobacterium                       | 2.2593           |
| AAR21097            | rbcL | Thioalkalispira microaerophila                   | 2.216            |
| AAM26289            | rbcL | Uncultured bacterium                             | 2.1916           |
| ZP_00009413         | rbcL | Rhodopseudomonas palustris                       | 1.9111           |
| AAM30945            | rbcL | Methanosarcina mazei Go1                         | 1.8641           |
| BAA94444            | rbcL | Uncultured deep-sea autotrophic bacterium ORII-2 | 1.8121           |
| BAA94449            | rbcL | Uncultured deep-sea autotrophic bacterium ORII-7 | 1.6565           |
| BAC54026            | rbcL | Rhodobacter veldkampii                           | 1.6529           |
| BAA92481            | rbcL | Uncultured deep-sea autotrophic bacterium OTI-12 | 1.6344           |
| ZP_00009863         | rbcL | Rhodopseudomonas palustris                       | 1.611            |
| AAM34469            | rbcL | Uncultured bacterium                             | 1.5313           |
| NP_070416           | rbcL | Archaeoglobus fulgidus DSM 4304                  | 1.4807           |
| AAR21099            | rbcL | Acidithiobacillus ferrooxidans                   | 1.4524           |
| AAM26291            | rbcL | Uncultured bacterium                             | 1.4081           |
| BAA94428            | rbcL | Uncultured deep-sea autotrophic bacterium SBII-1 | 1.3347           |
| BAA94432            | rbcL | Uncultured deep-sea autotrophic bacterium SBII-5 | 1.2621           |
| BAA92469            | rbcL | Uncultured deep-sea autotrophic bacterium TAGI-1 | 1.2023           |
| BAA92490            | rbcL | Uncultured deep-sea autotrophic bacterium OTI-4  | 1.1499           |
| AAM26292            | rbcL | Uncultured bacterium                             | 1.1211           |
| AAR03657            | rbcL | Uncultured proteobacterium                       | 1.0893           |
| ZP_00011740         | rbcL | Rhodopseudomonas palustris                       | 1.0766           |
| NP_682296           | rbcL | Thermosynechococcus elongatus BP-1               | 1.0719           |
| AAR00245            | rbcL | Xanthobacter sp. COX                             | 1.0493           |
| BAA94431            | rbcL | Uncultured deep-sea autotrophic bacterium SBII-4 | 1.0112           |
